# Supplementary material for: Copper on chitosan: a recyclable heterogeneous catalyst for azide–alkyne cycloaddition reactions in water
Source: Royal Society of Chemistry journal article supplement (doi:10.1039/c3gc40401c), 2013-01-01

## **Copper on Chitosan: recyclable heterogeneous catalyst for azide-alkyl cycloaddition reactions in water**

**R. B. Nasir Baig and Rajender S. Varma\***

### **Supporting information**

#### **Experimental procedure for synthesis of Chitosan copper catalyst (Chit-CuSO<sub>4</sub>):**

Chitosan (5 g, medium molecular weight, Aldrich, CSA # 9012-76-4) was suspended in 100 mL of water. To this suspension, 1 g of CuSO<sub>4</sub>.5H<sub>2</sub>O was added and stirring was continued for 2h. The catalyst was separated using centrifuge (5000 rpm 5 min), dried under vacuum at 50 °C. The catalyst was characterized by X-ray diffraction (XRD) (Fig 1b, MS) and using SEM (Fig.1 a, MS). The signals pertaining to copper metal were not detected in XRD; it may be due to complexation with chitosan or low percentage. The weight percentage of copper was found to be 5.1 % by inductively coupled plasma-atomic emission spectroscopy (ICP-AES) analysis.

#### **Synthesis of triazole from alkyl azide and alkyne**

1.2 mmol of alkyl azide, 1.0 mmol of alkyne and 5 mg of Chit-CuSO<sub>4</sub> catalyst were placed in a reaction tube. To this, 5 mL of water and a stirring bar was added. The reaction tube was placed on a magnetic stirrer and the reaction mixture was stirred for 4-12 h at room temperature. After the completion of the reaction, product was separated by extraction using ethyl acetate and the catalyst was separated by centrifugation (5000 rpm, 5 min). The products were purified by recrystallization or column chromatography. The recovered catalyst was dried and reused at least five times without losing its activity.

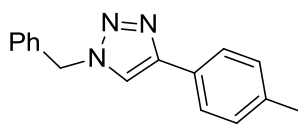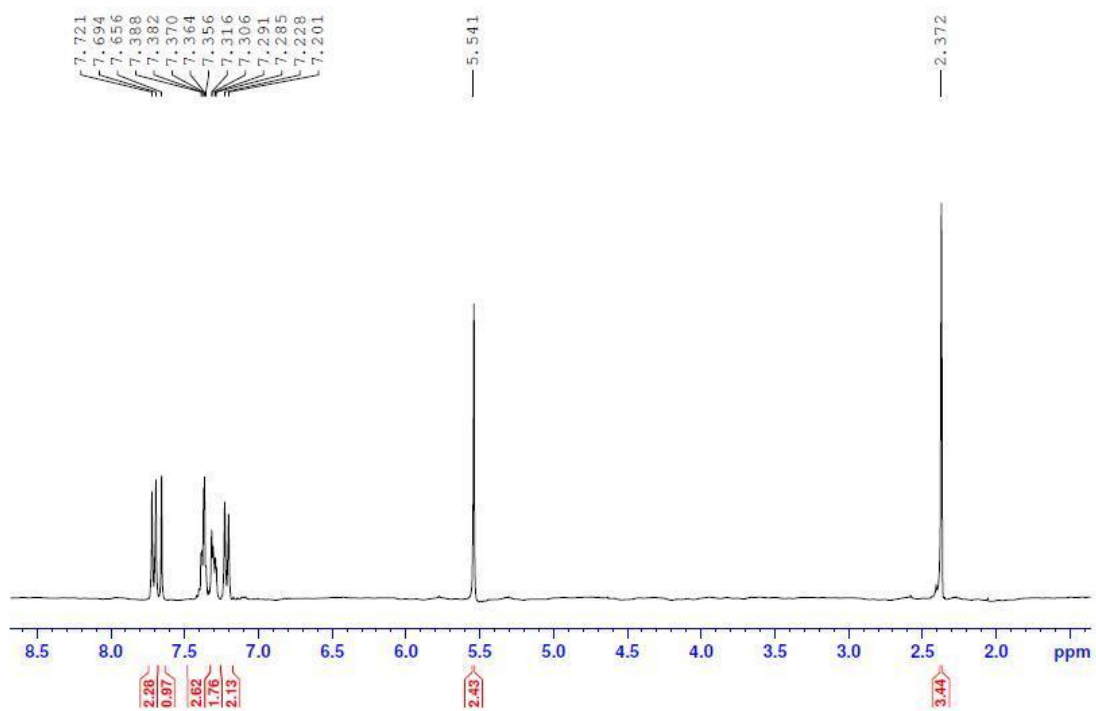

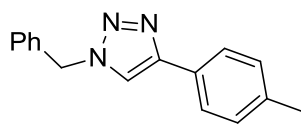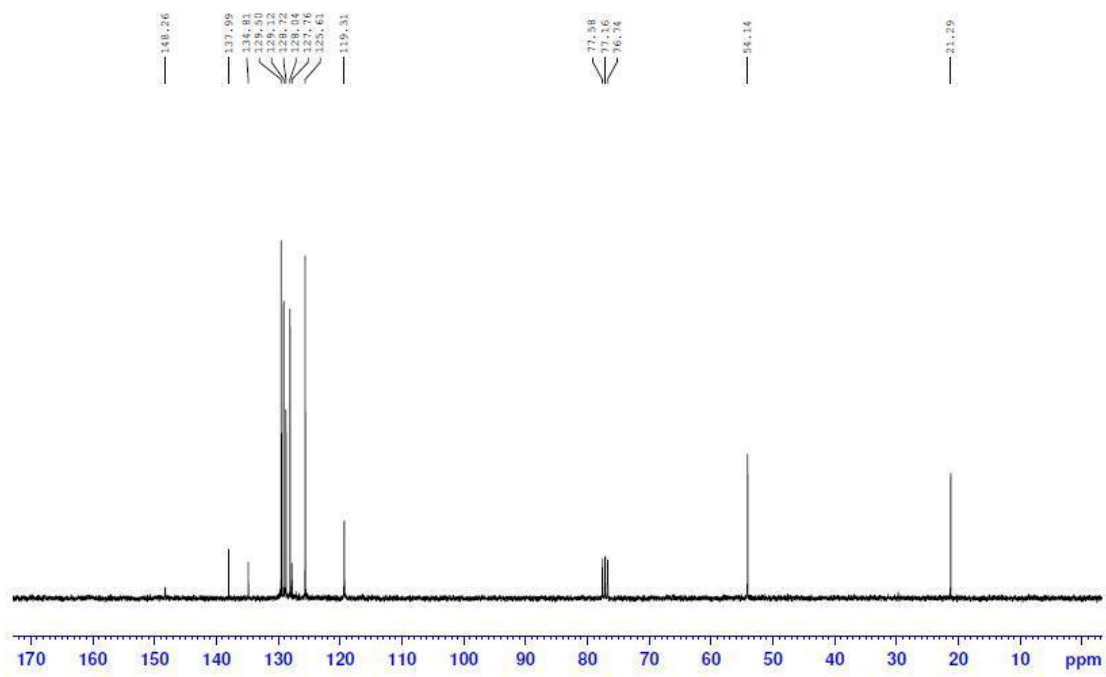

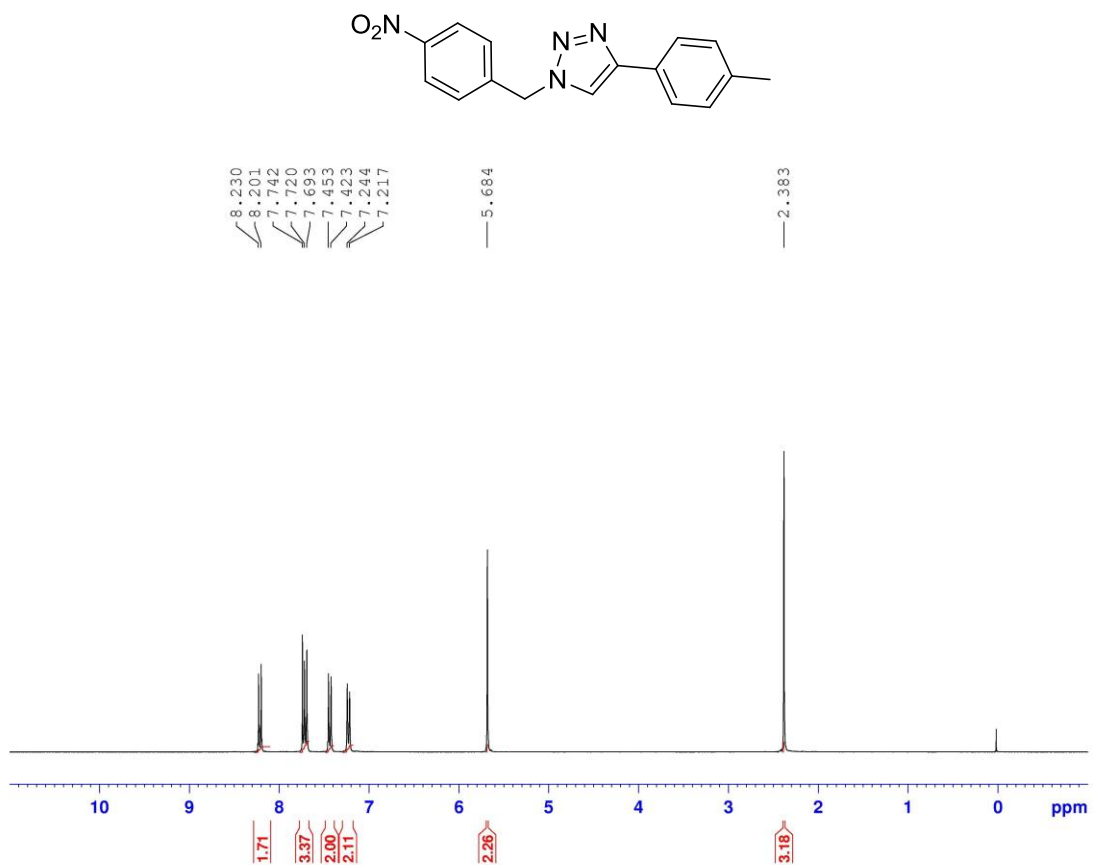

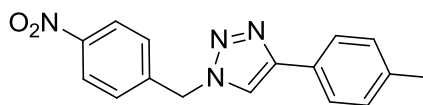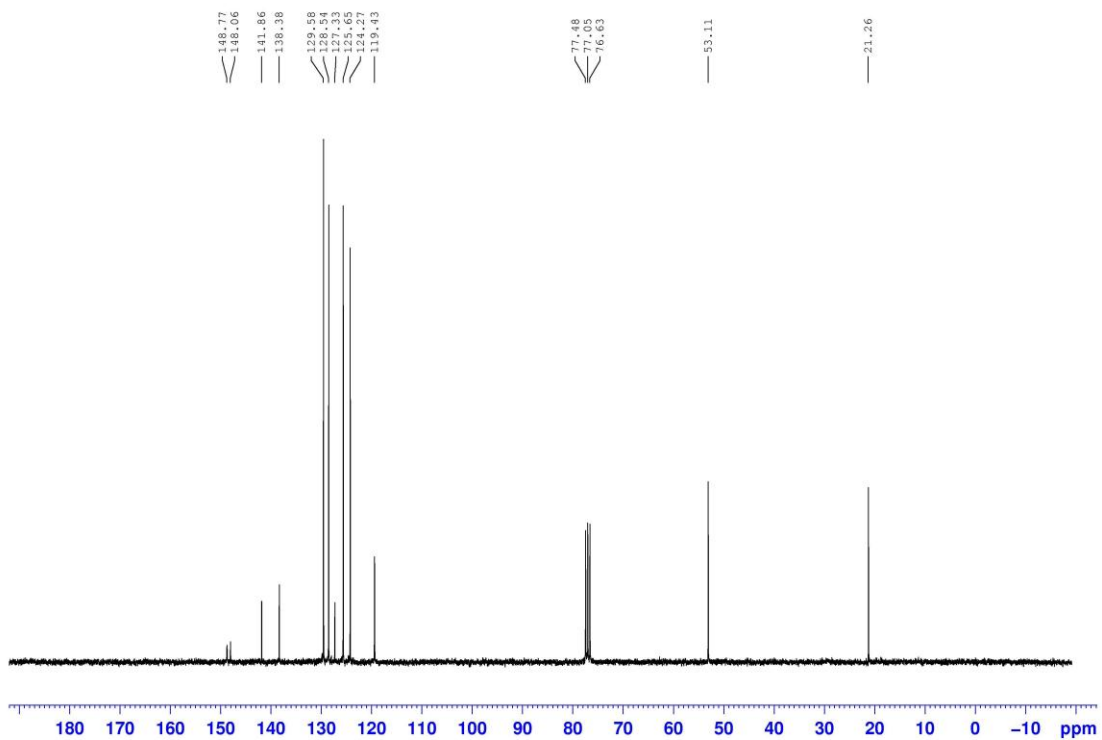

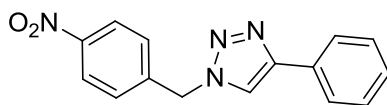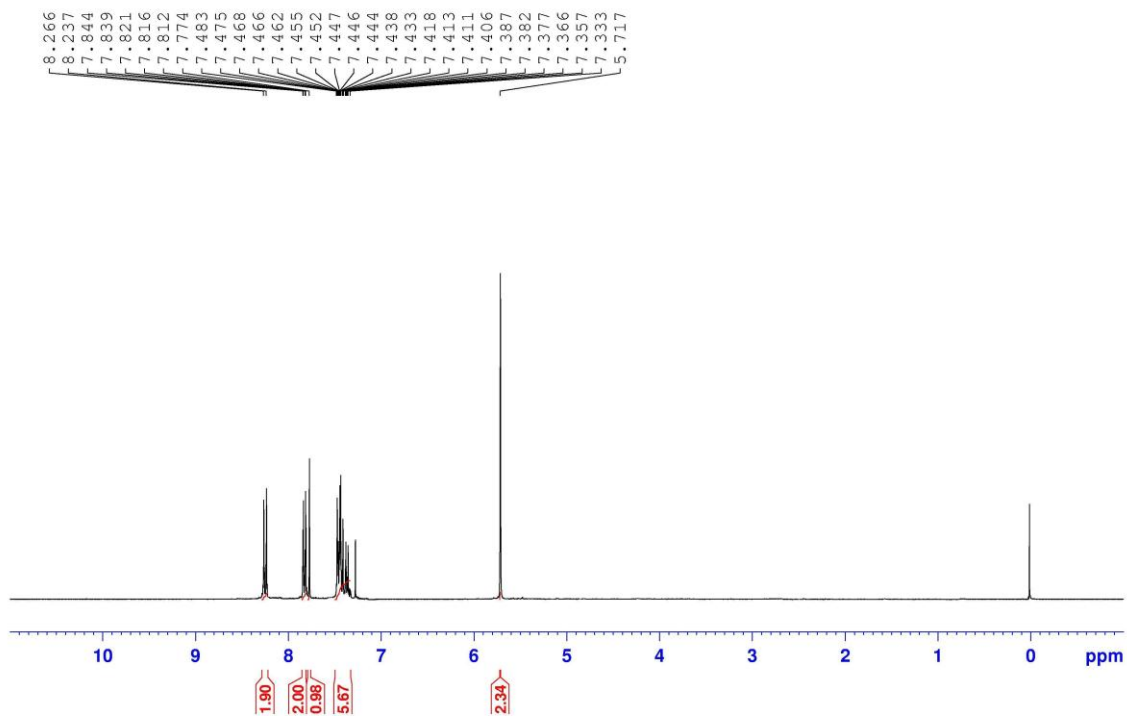

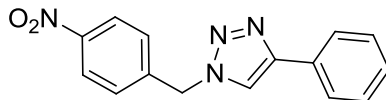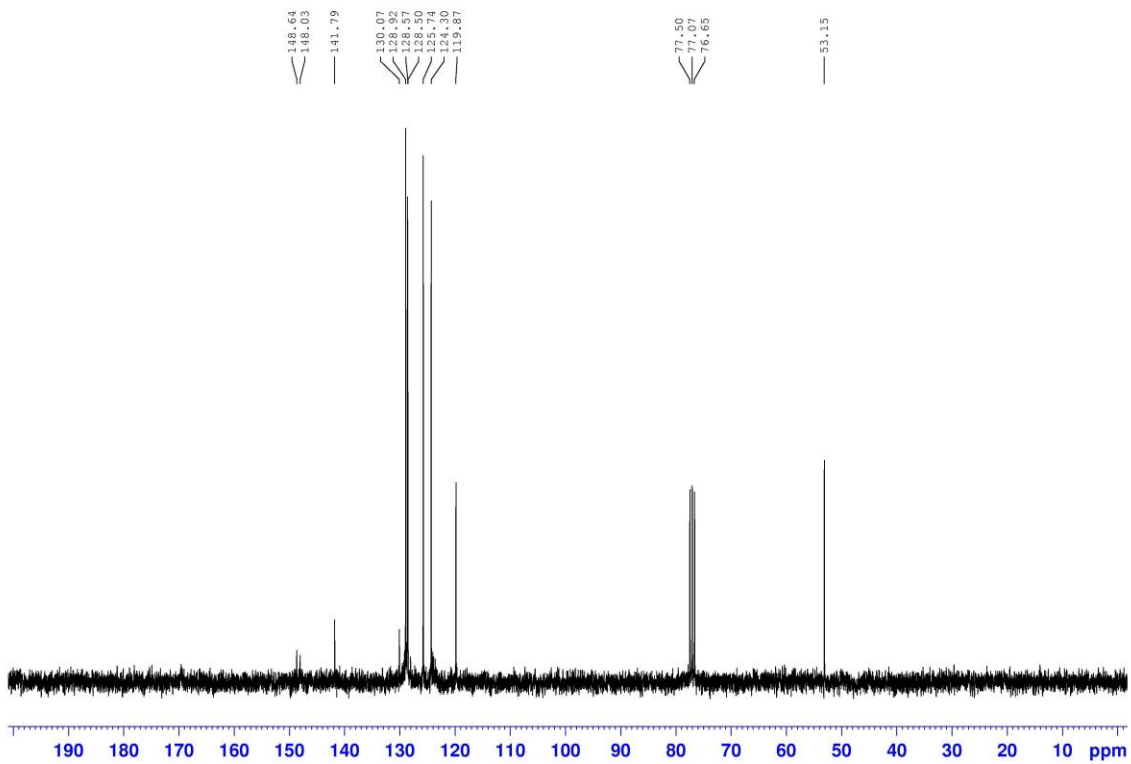

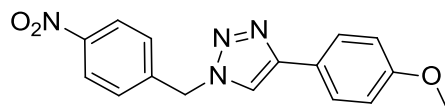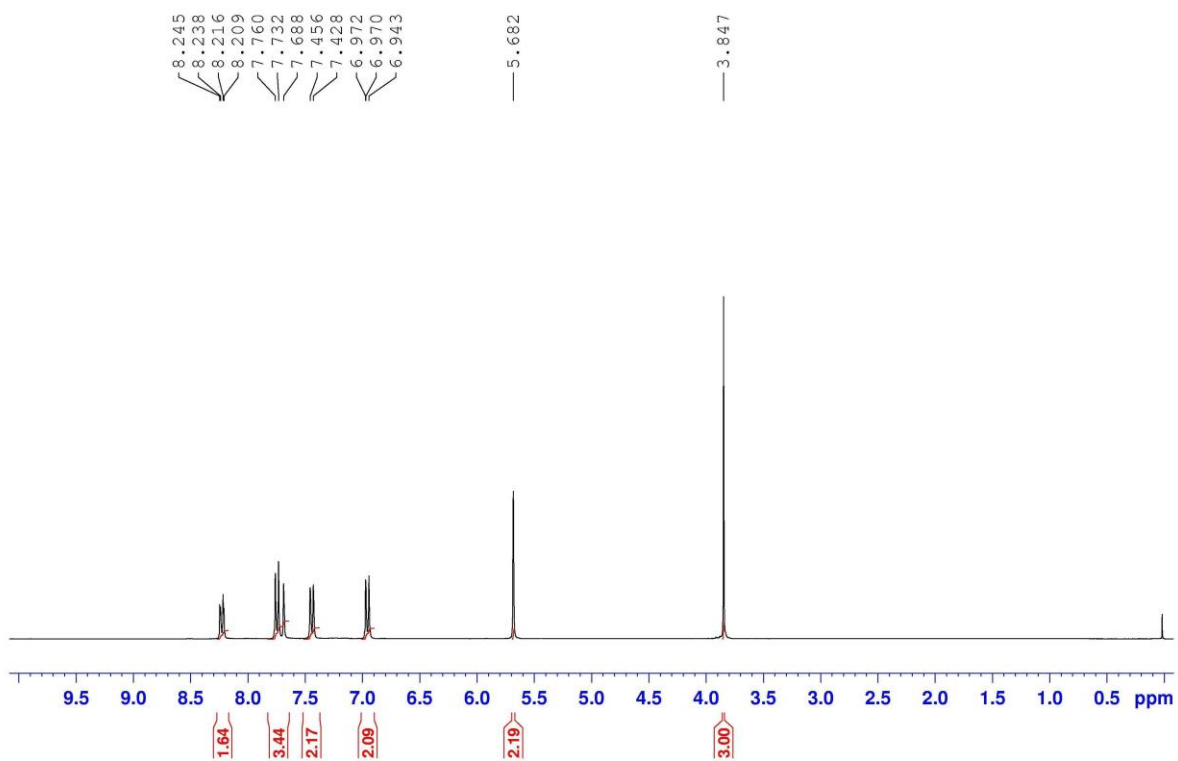



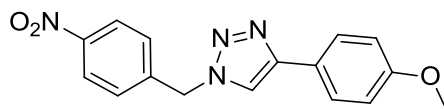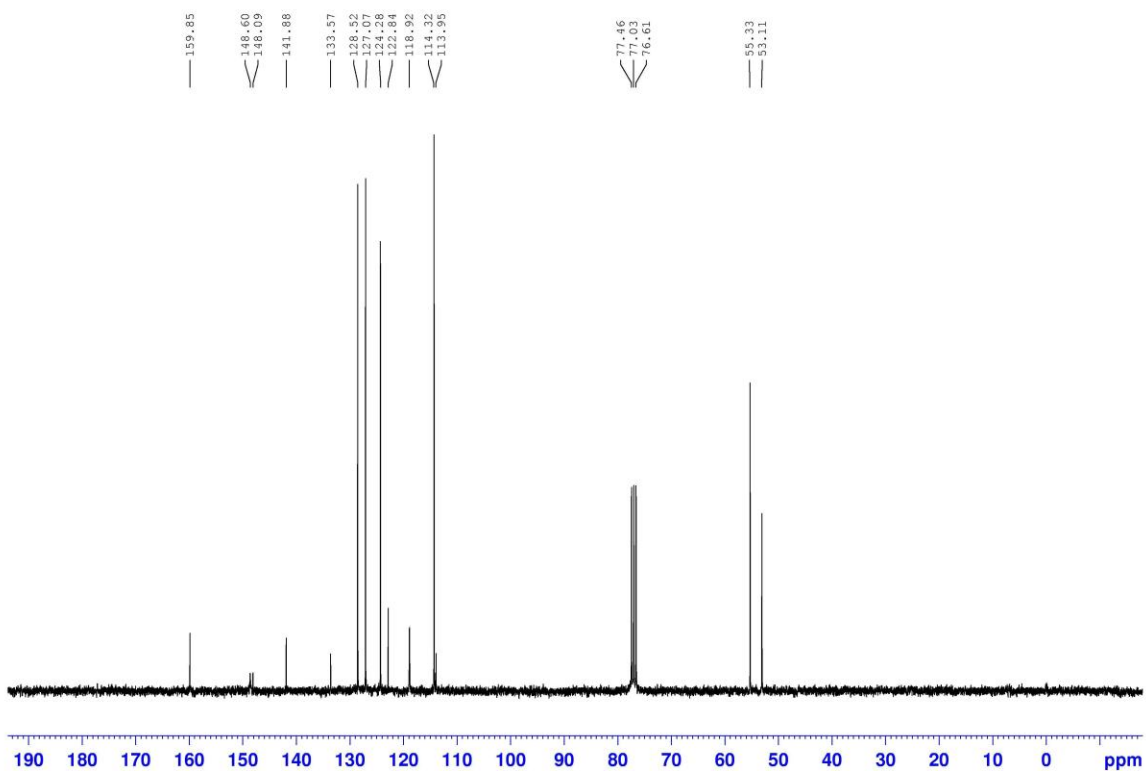

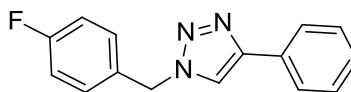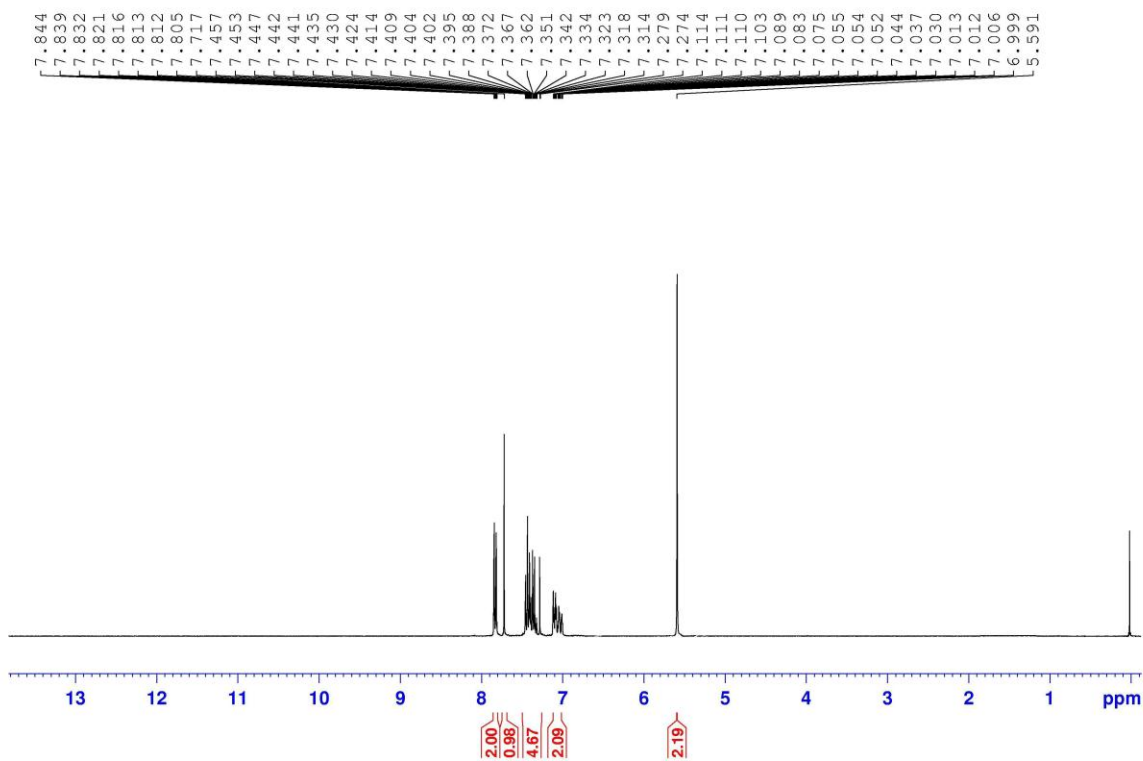

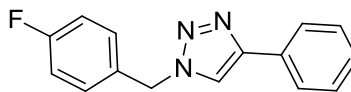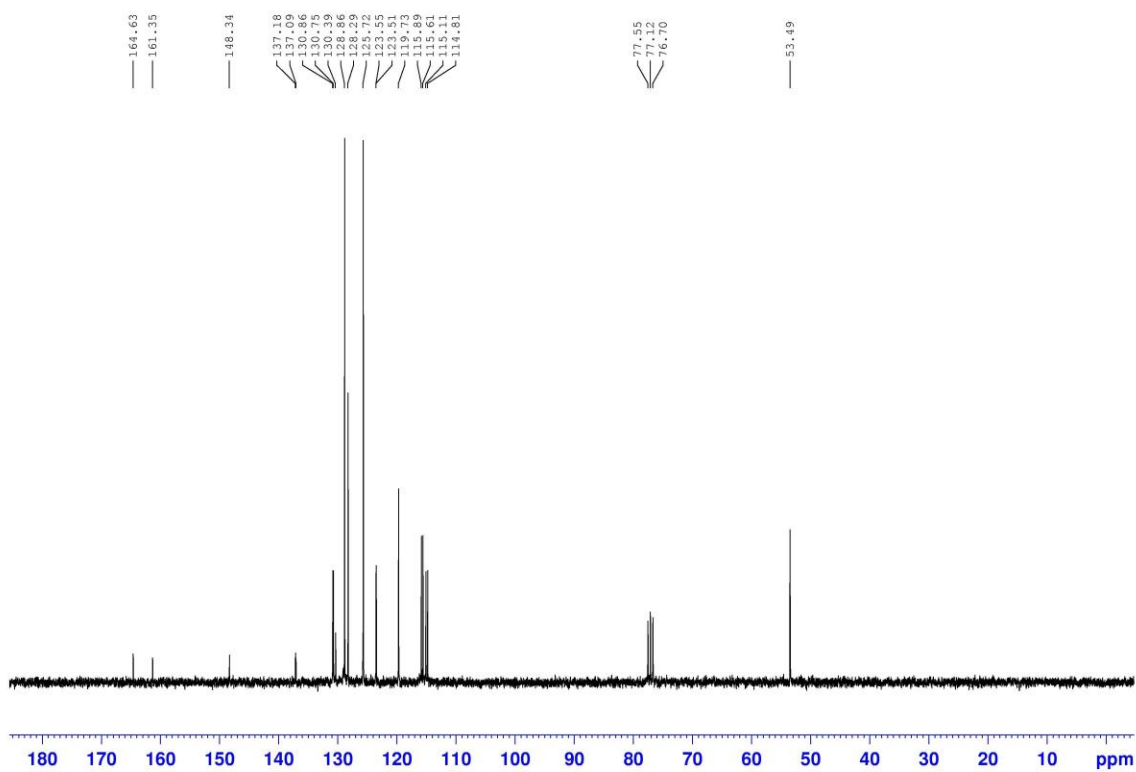

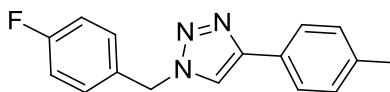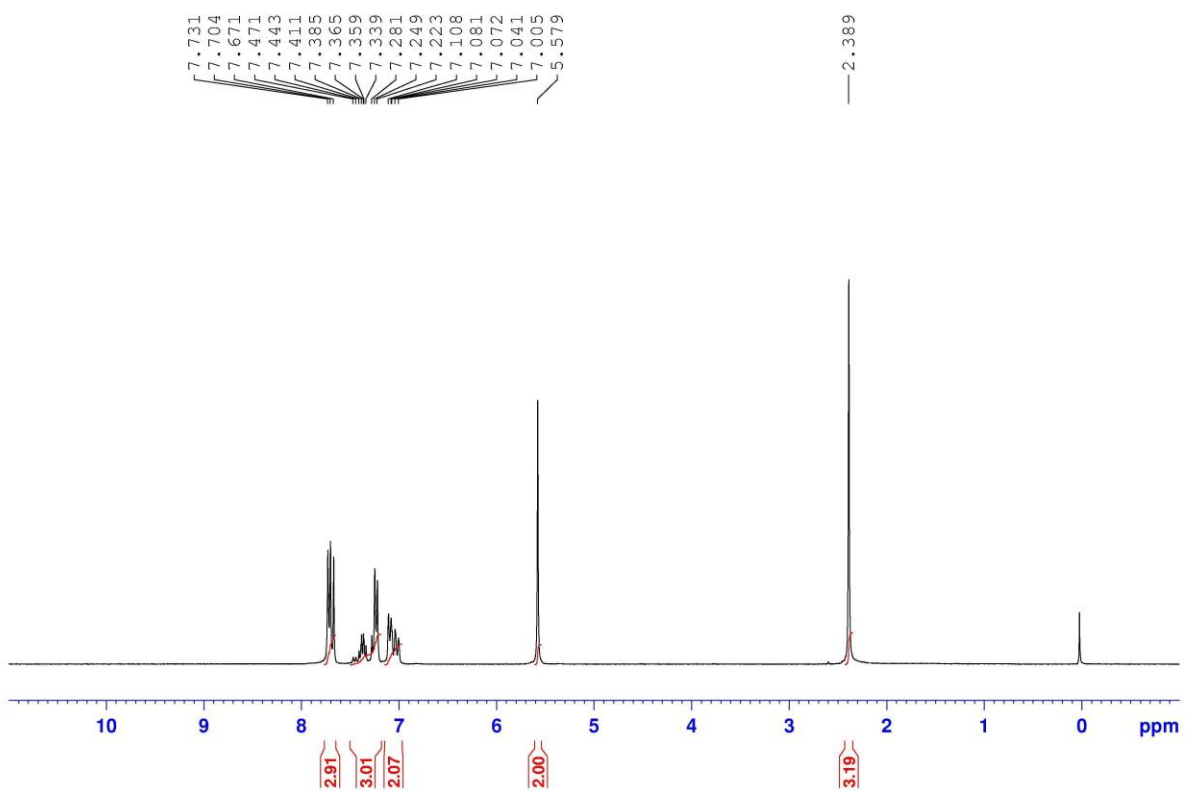

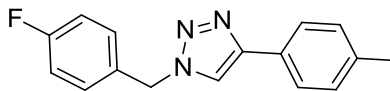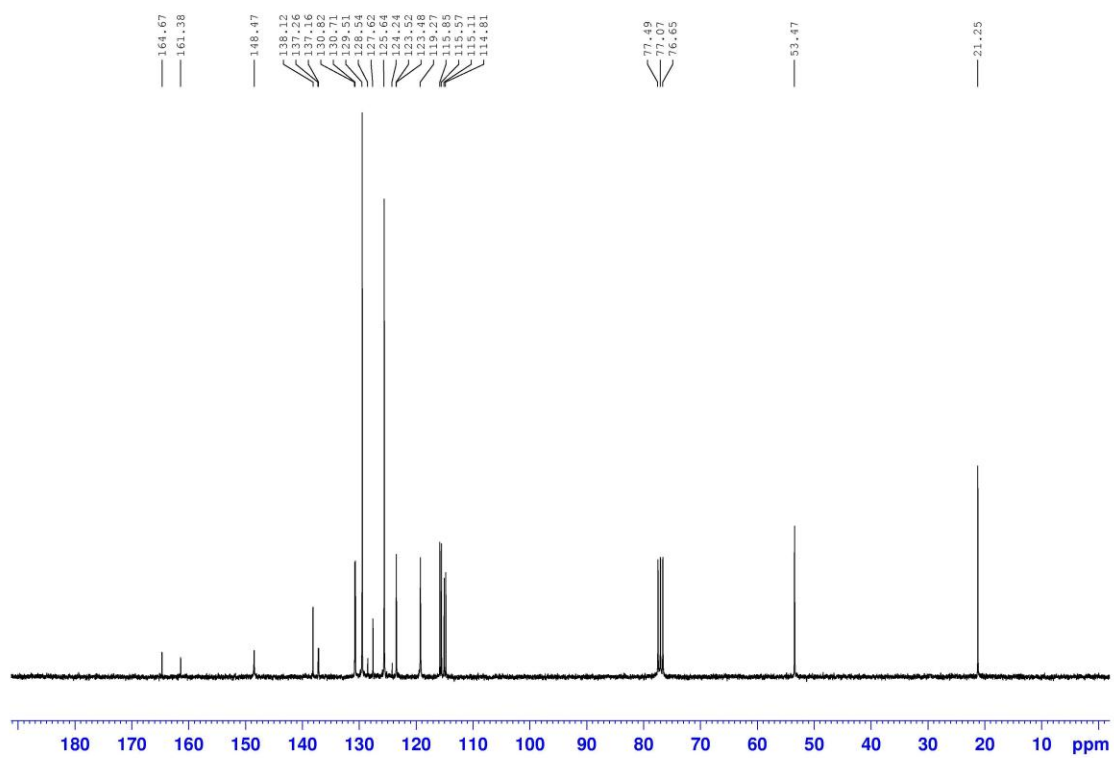

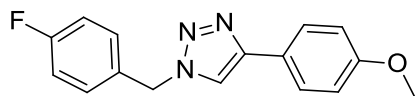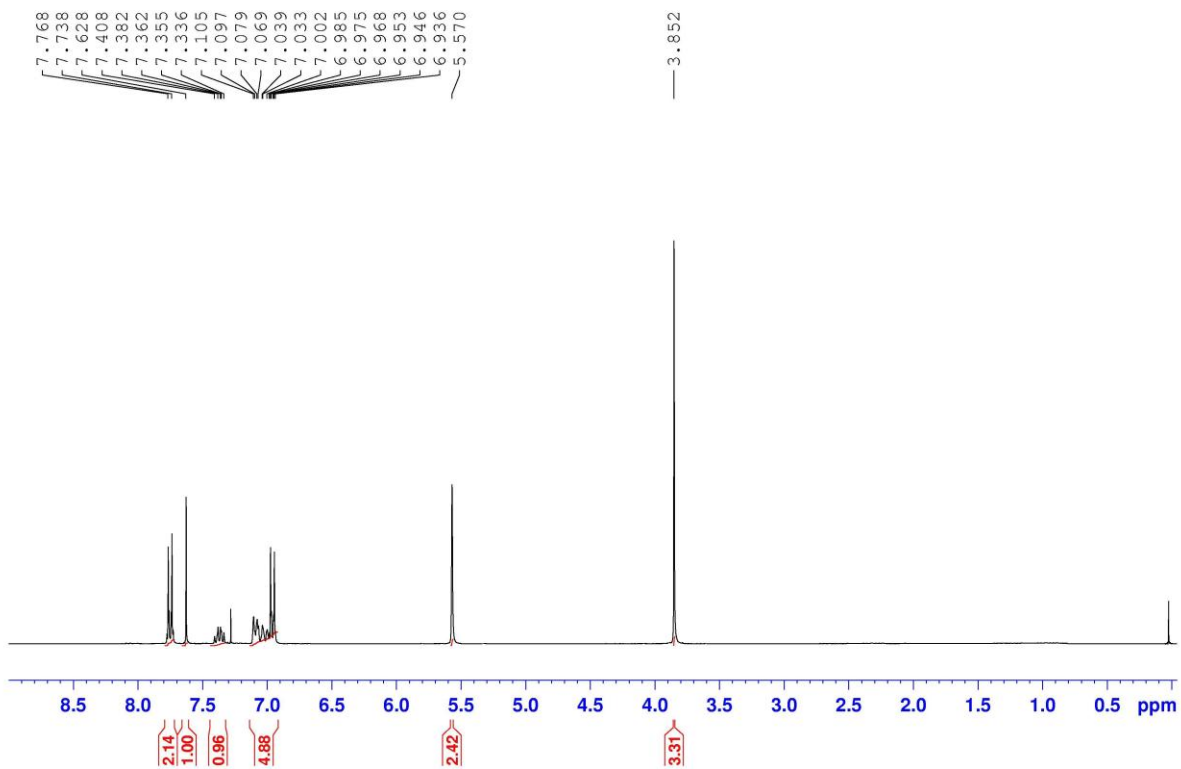

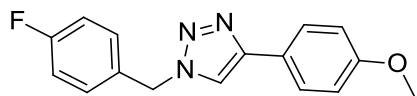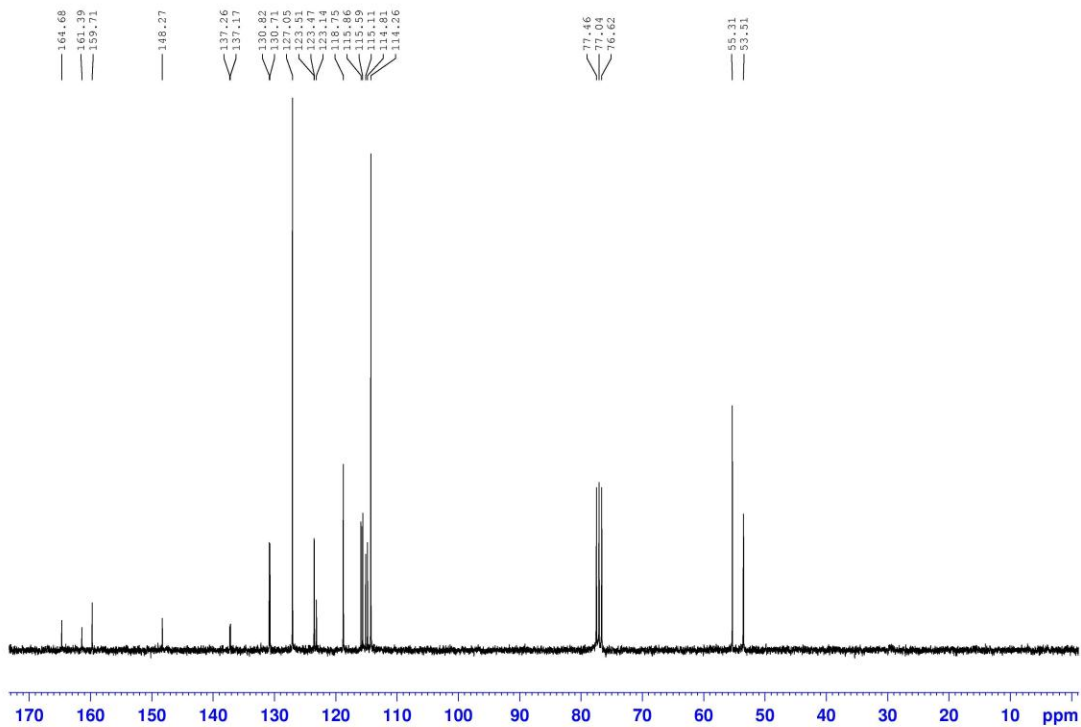

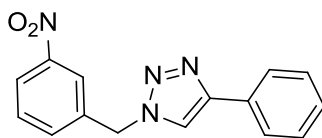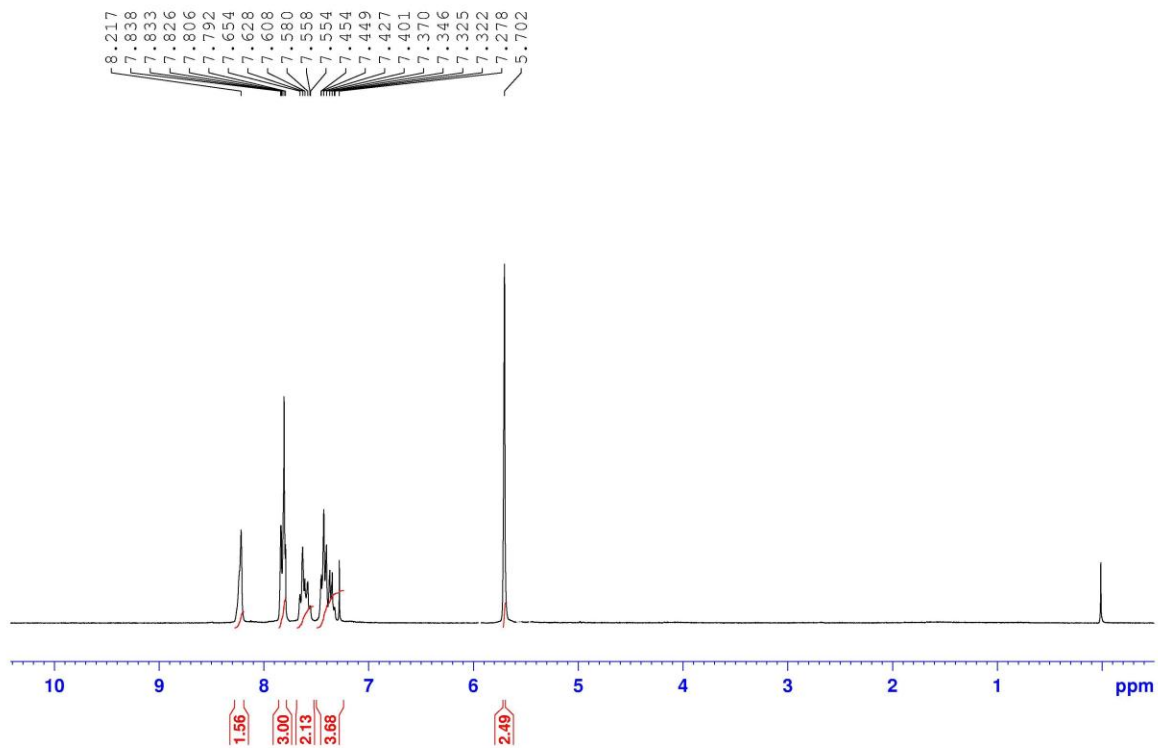



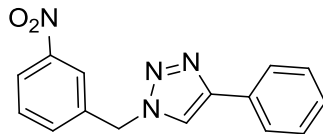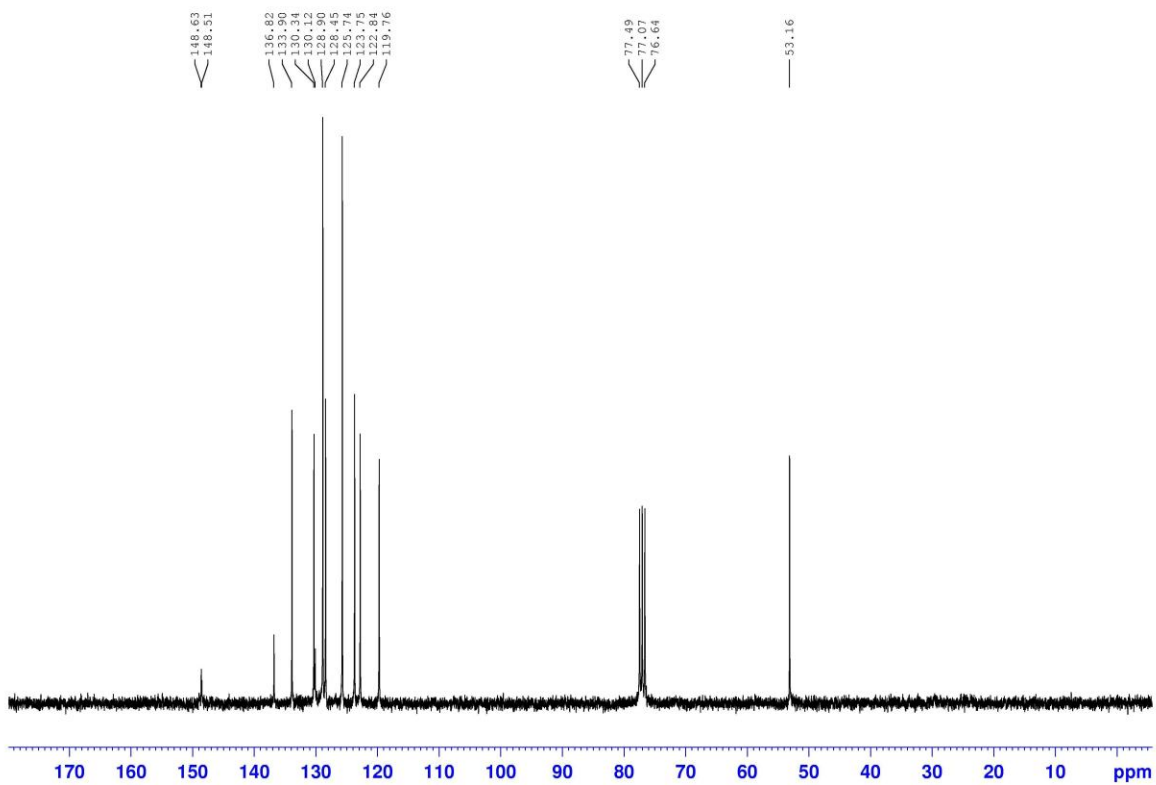

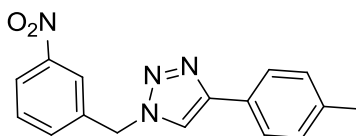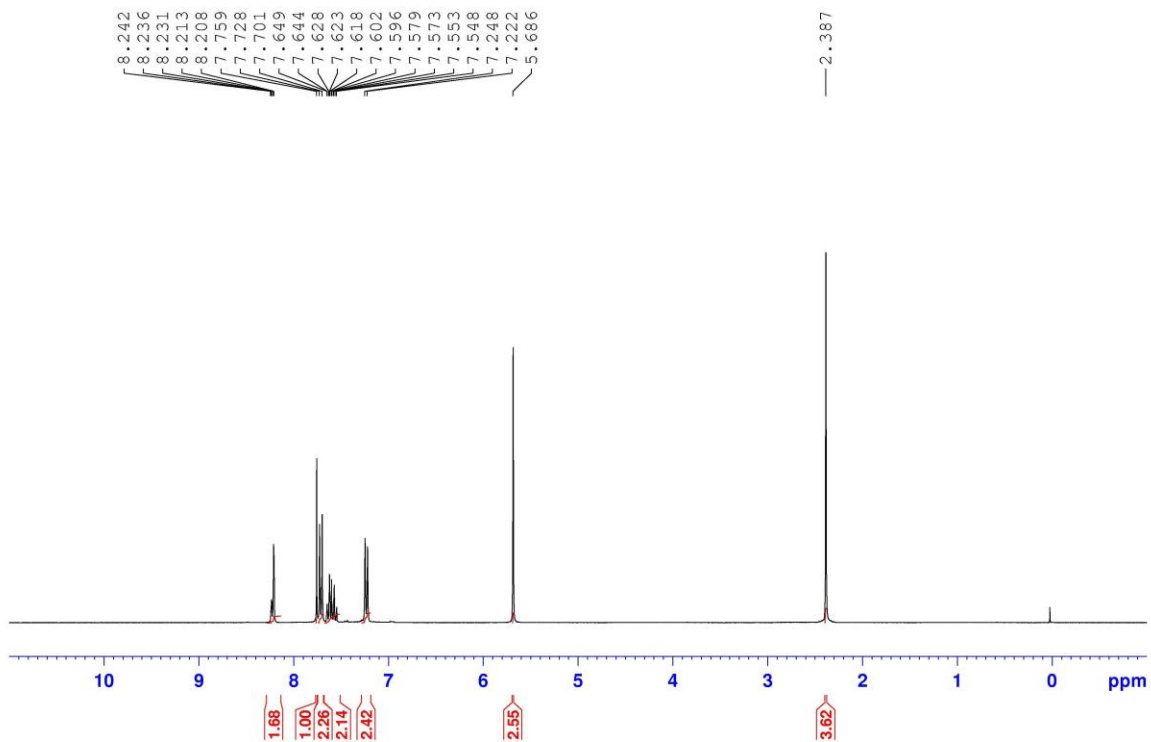

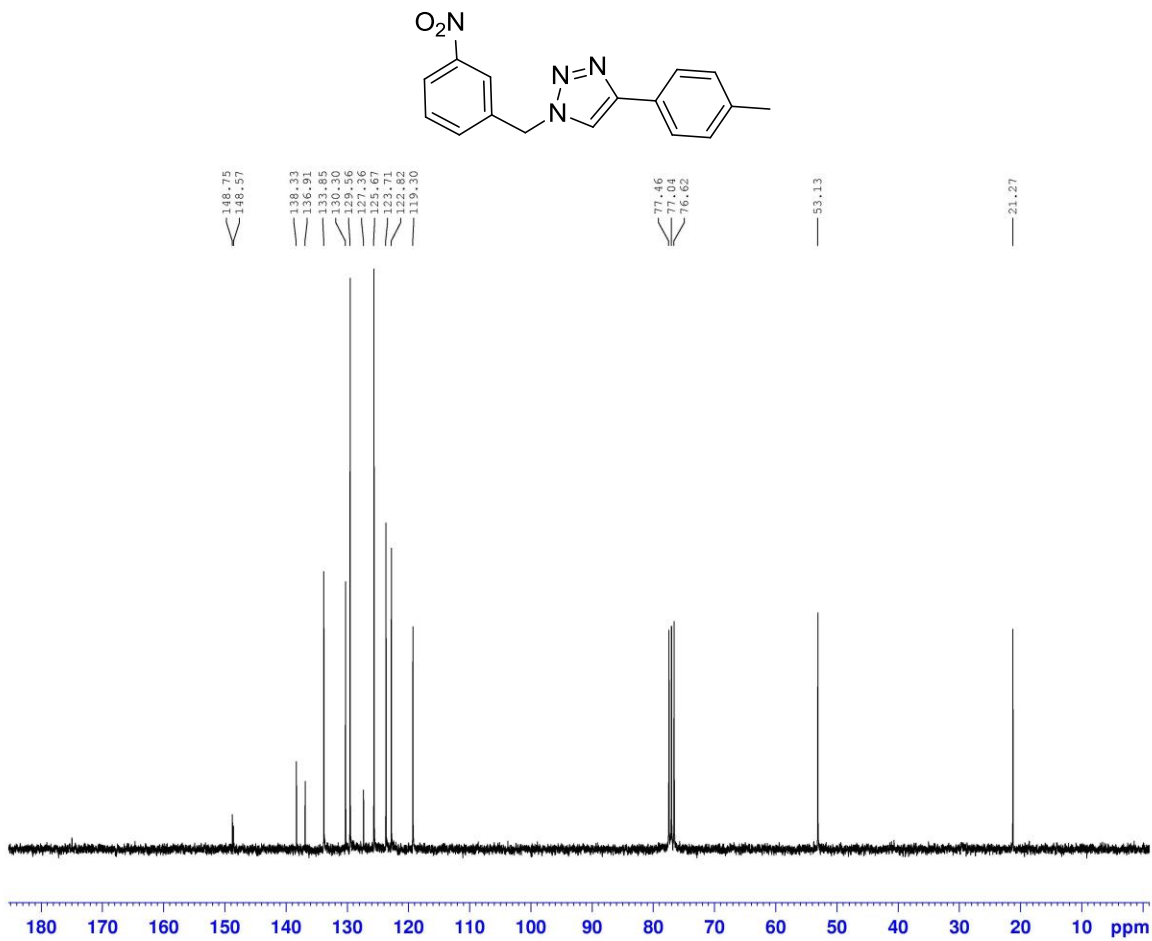

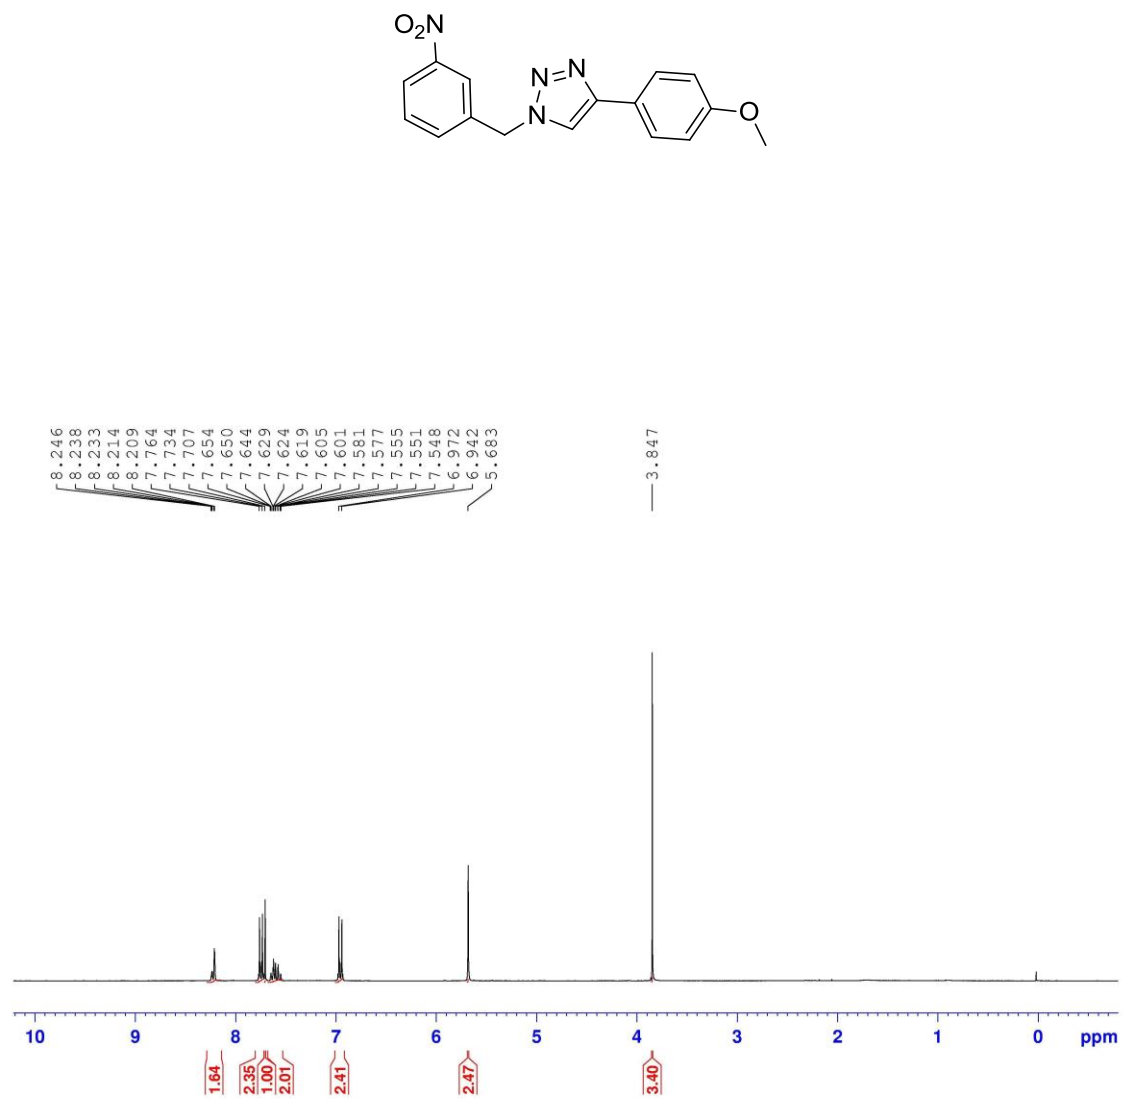

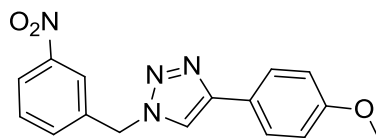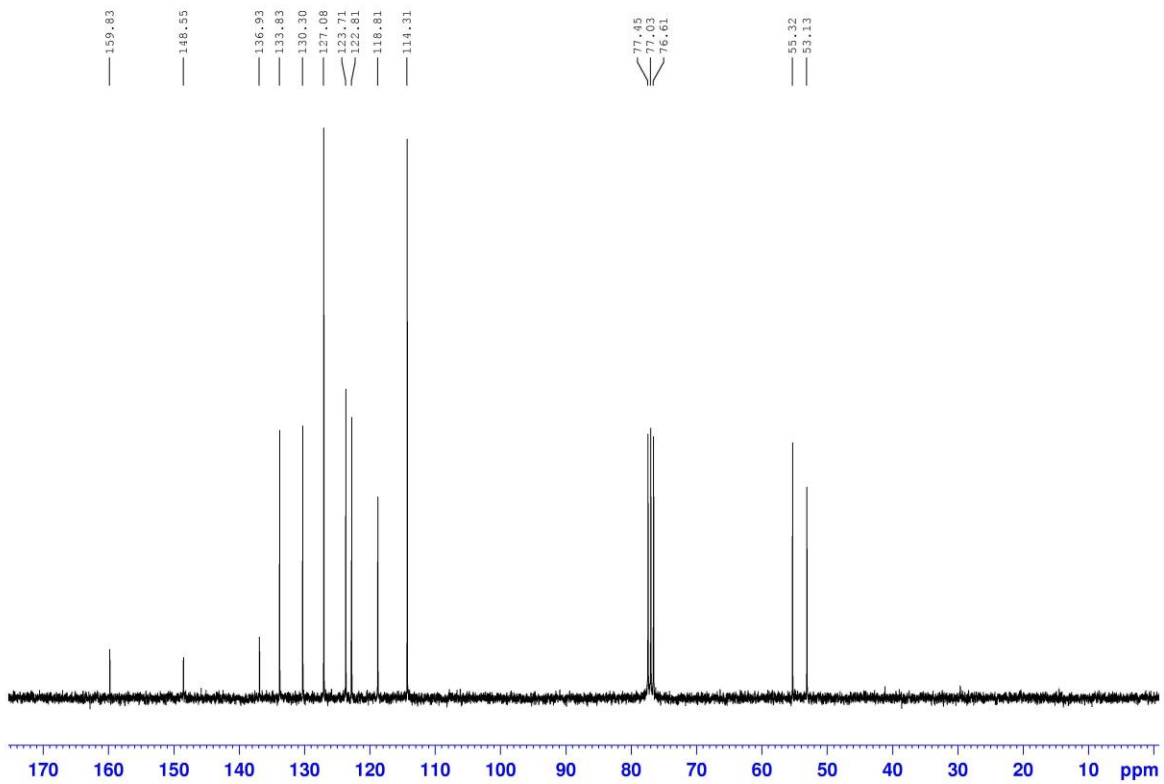

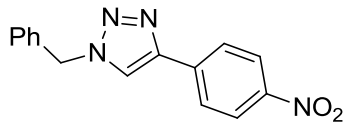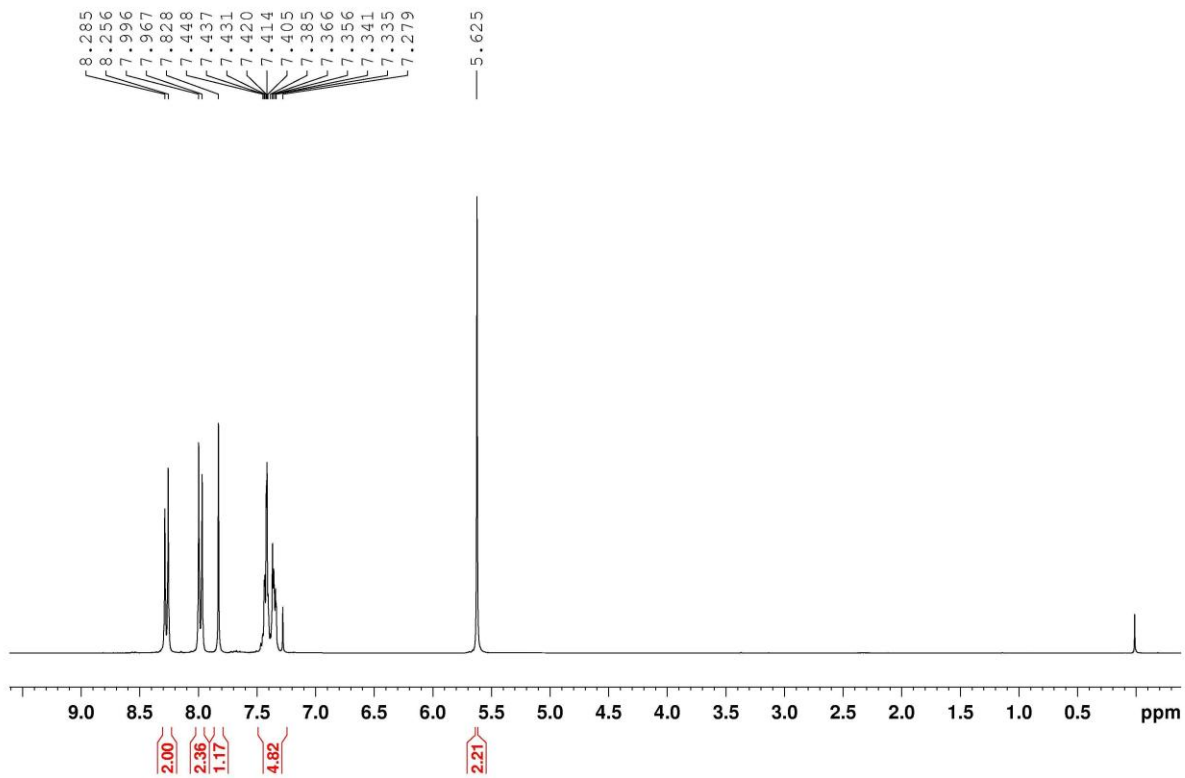

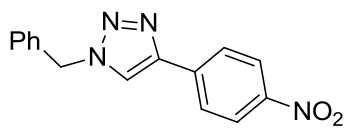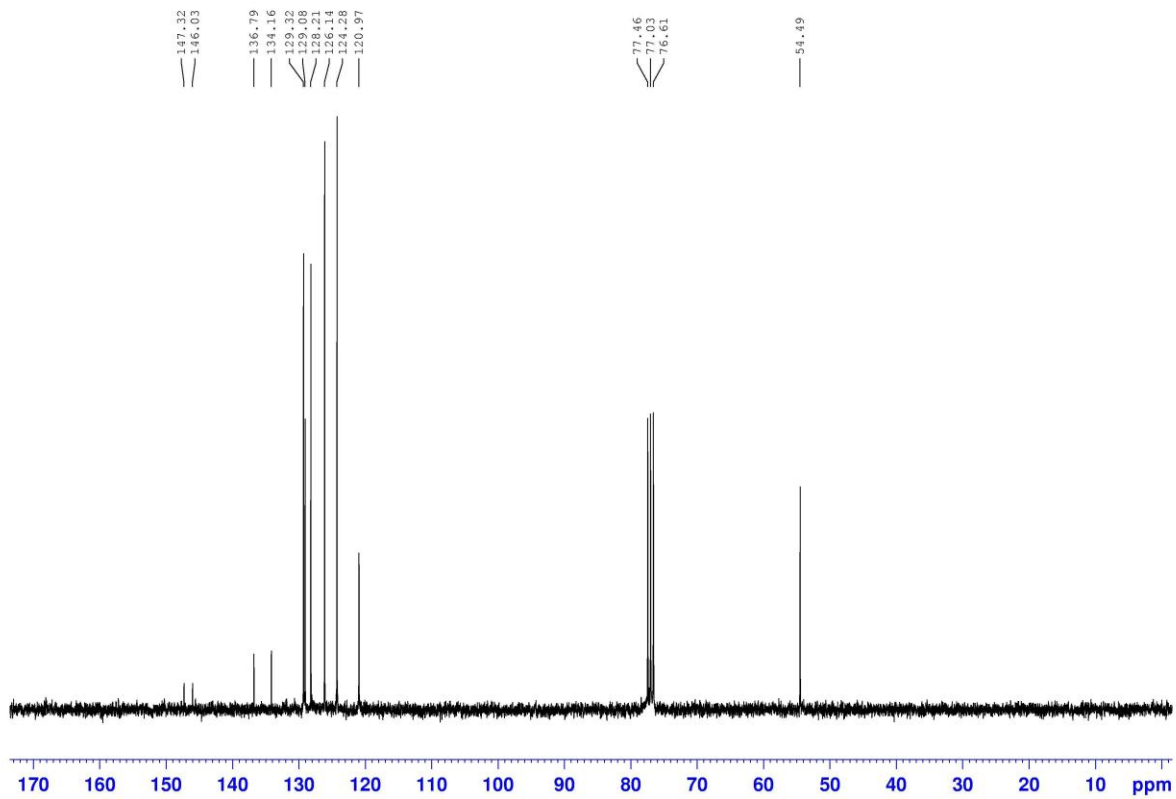

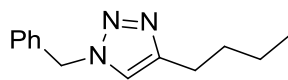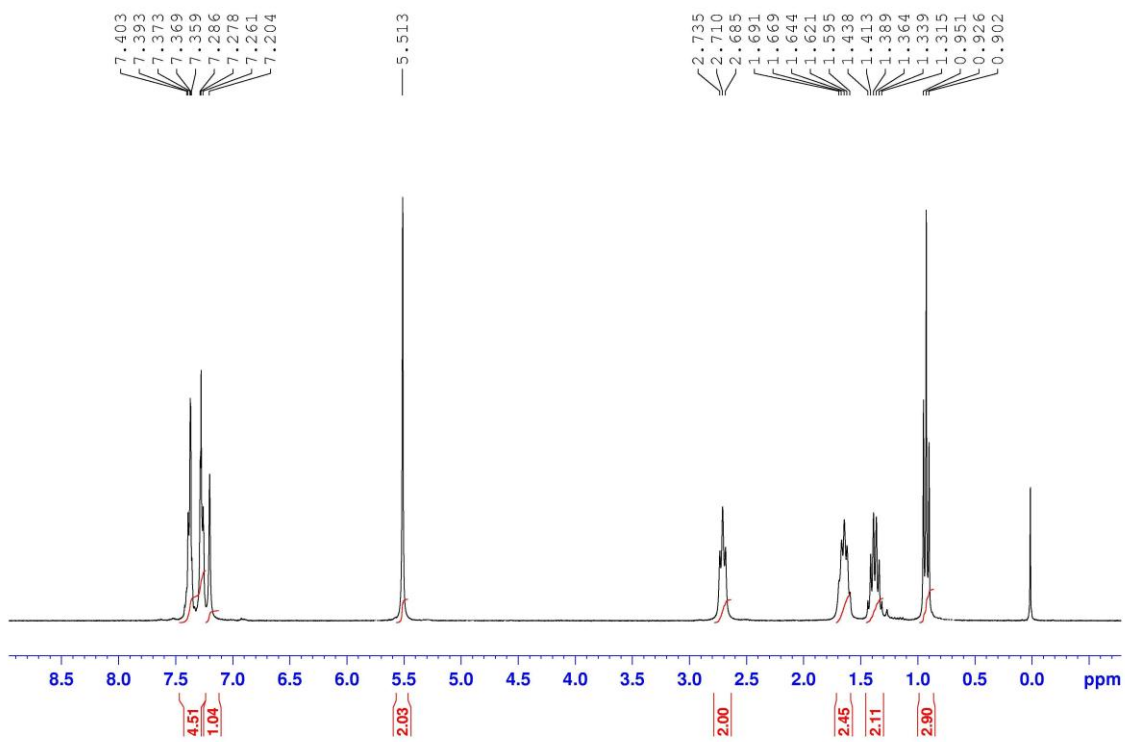



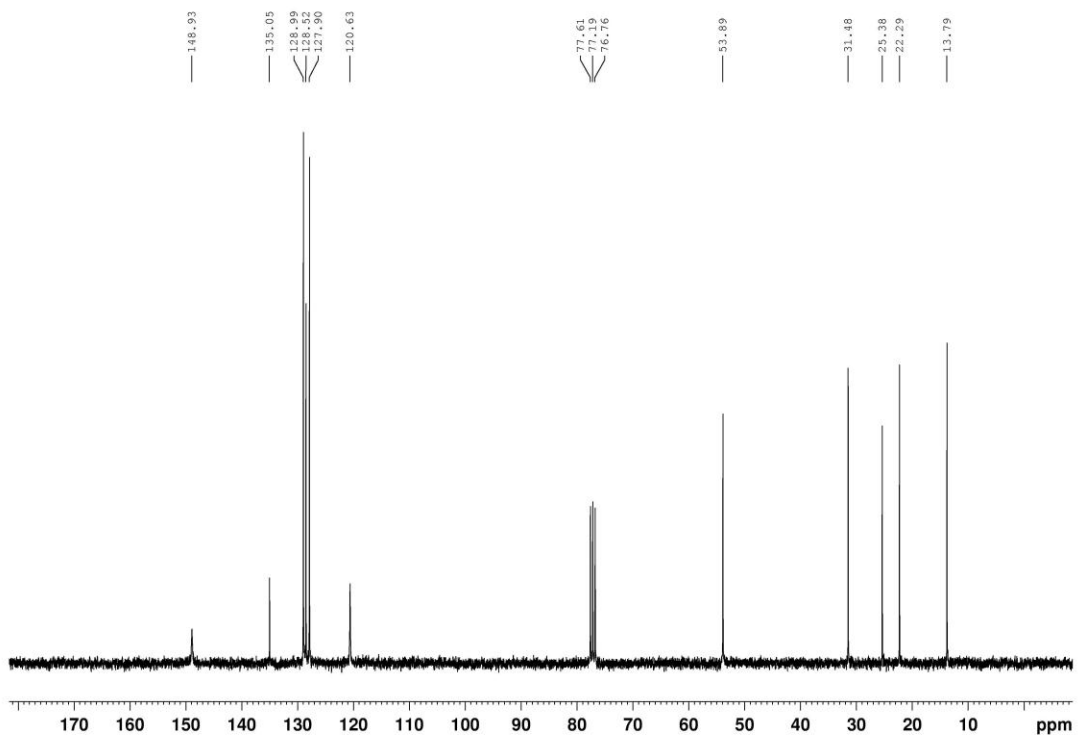

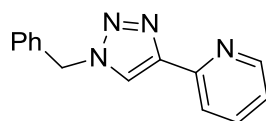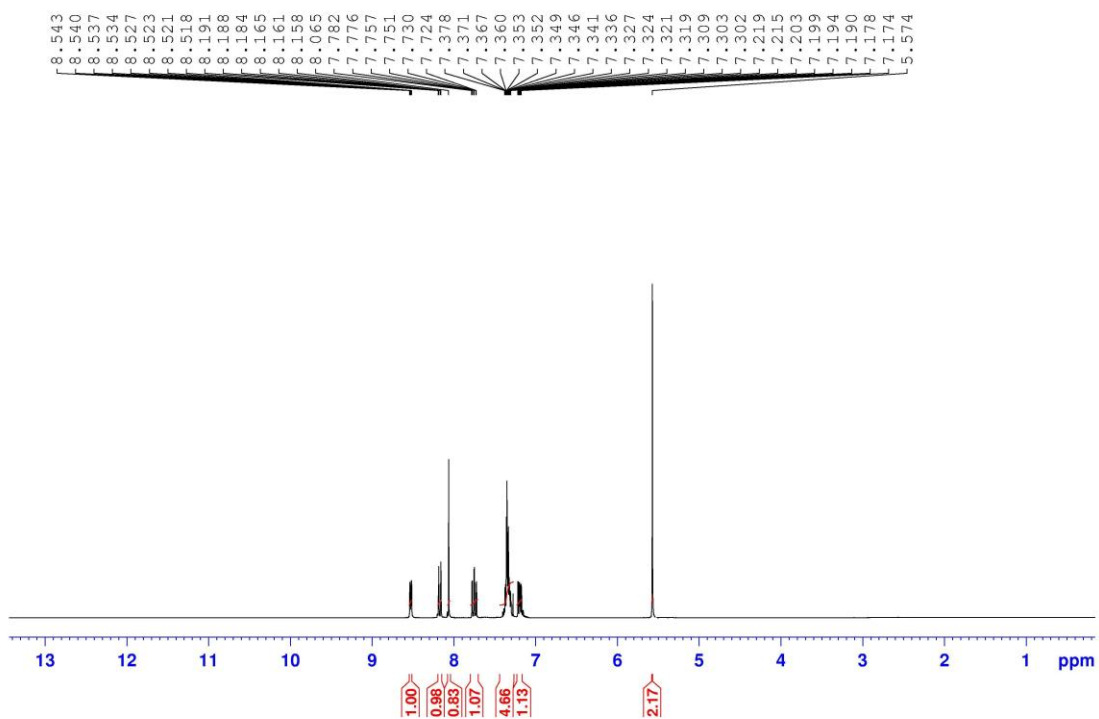

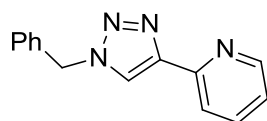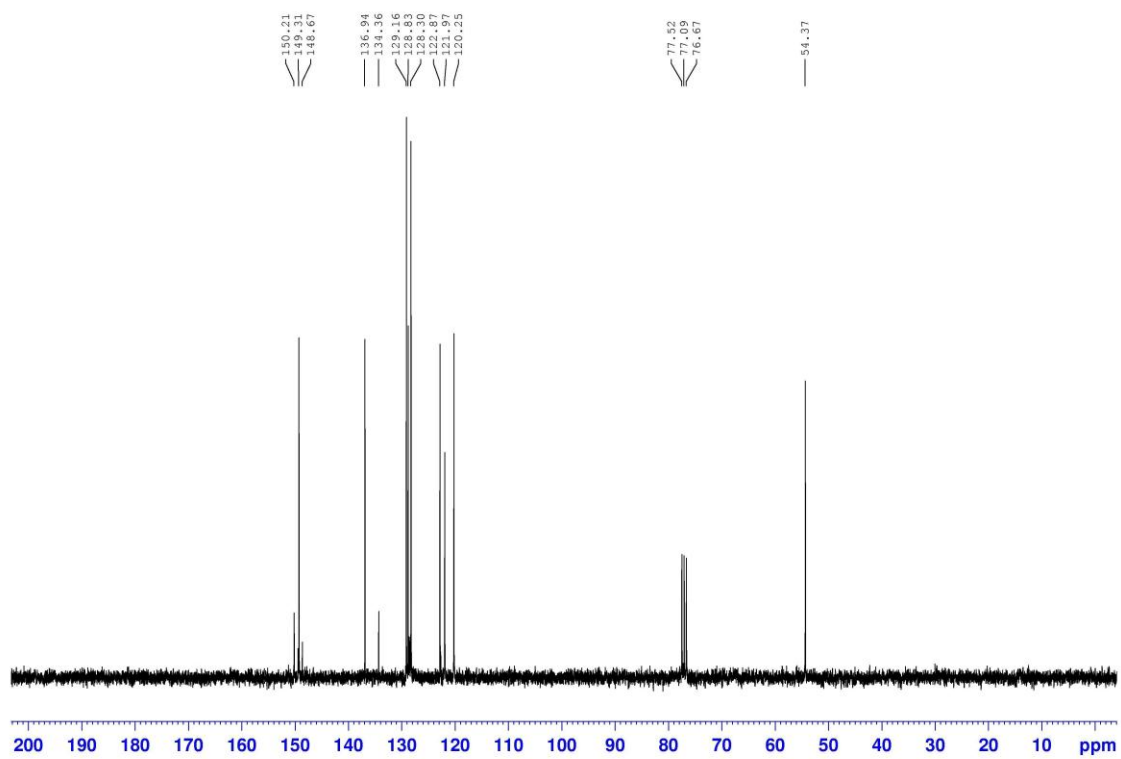

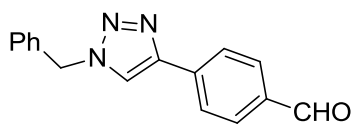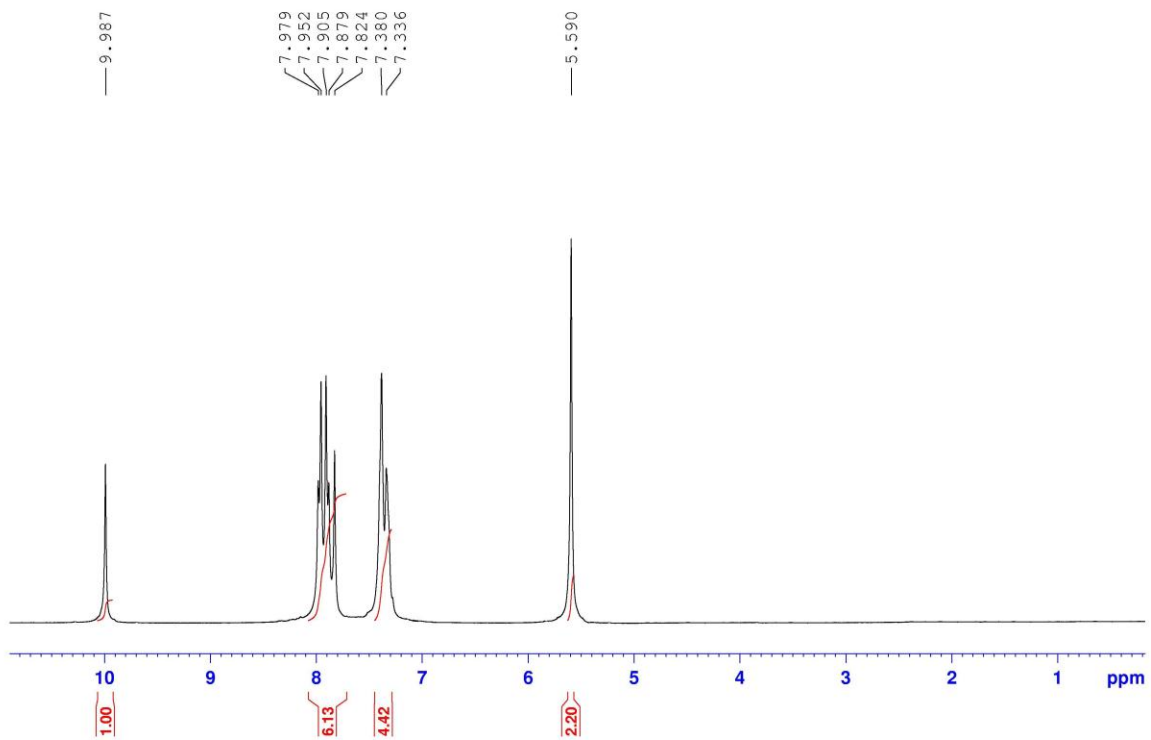

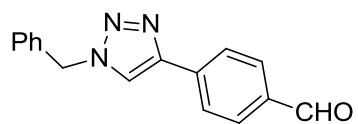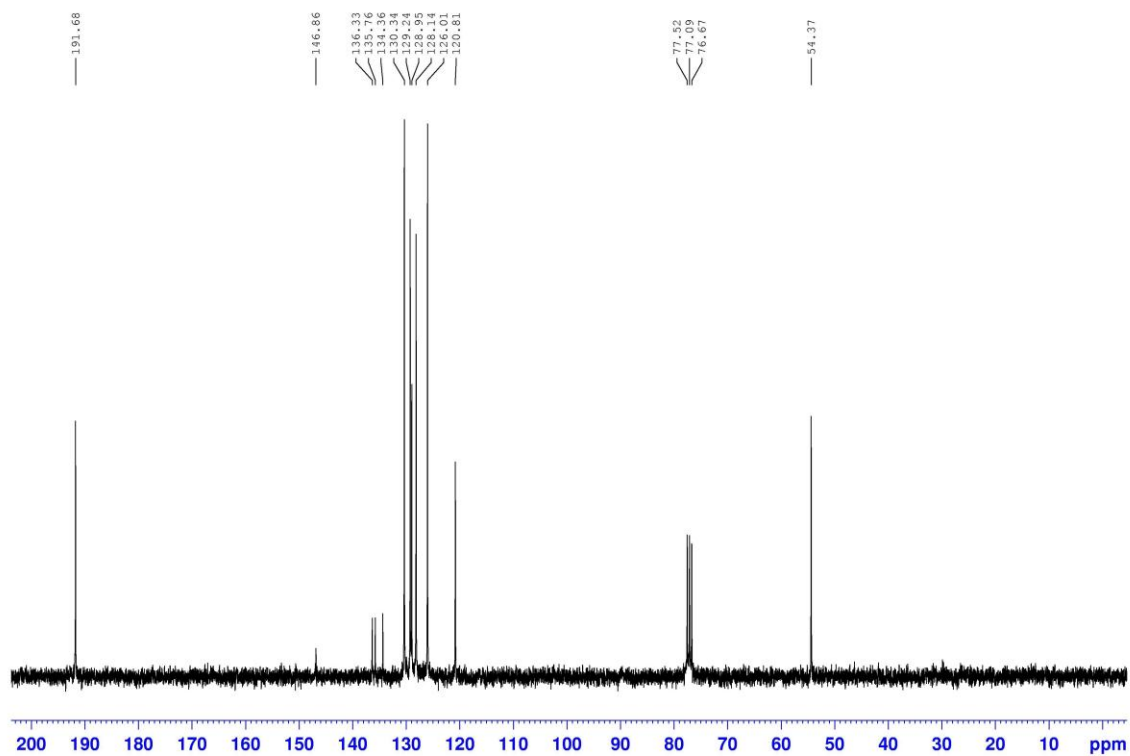

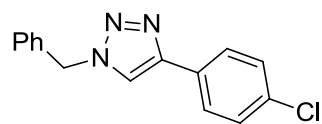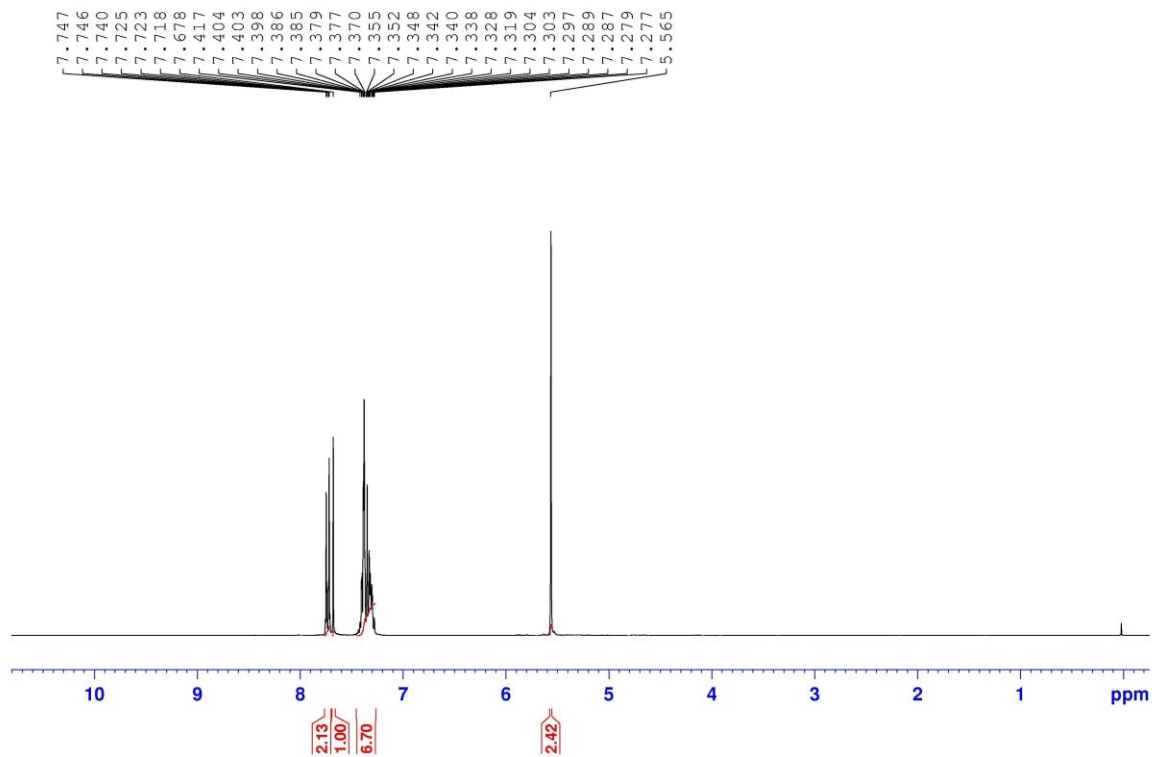

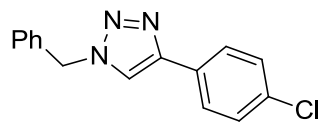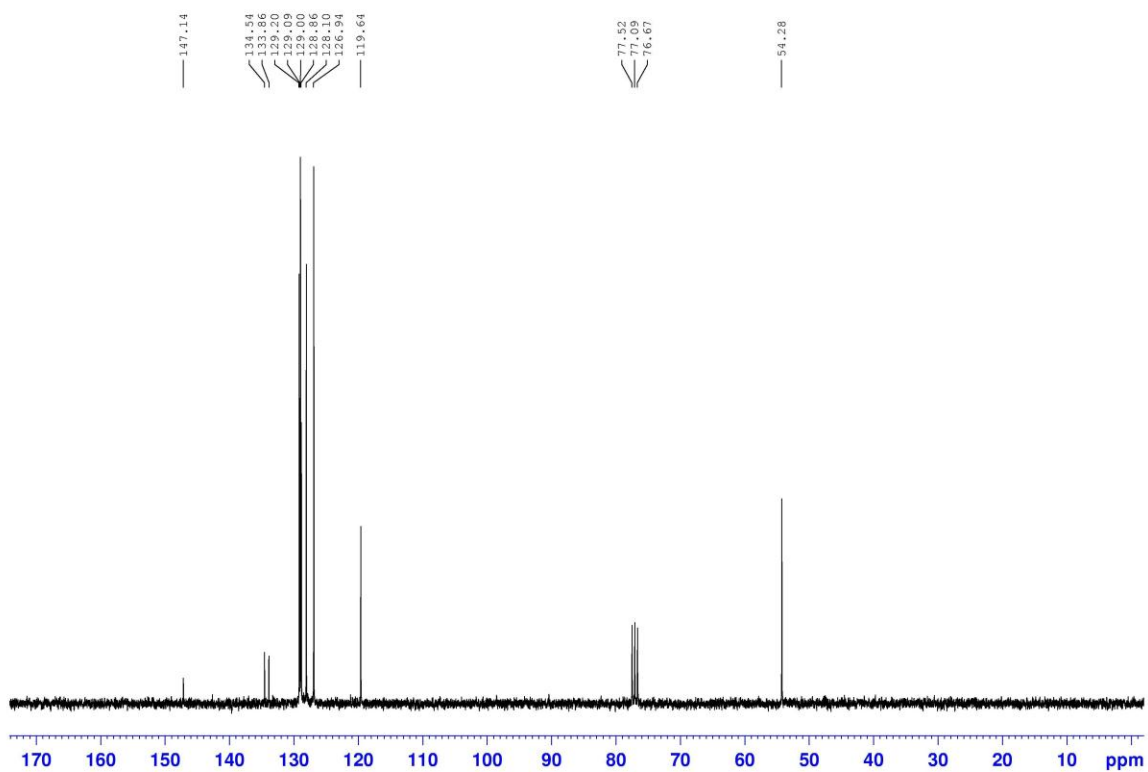

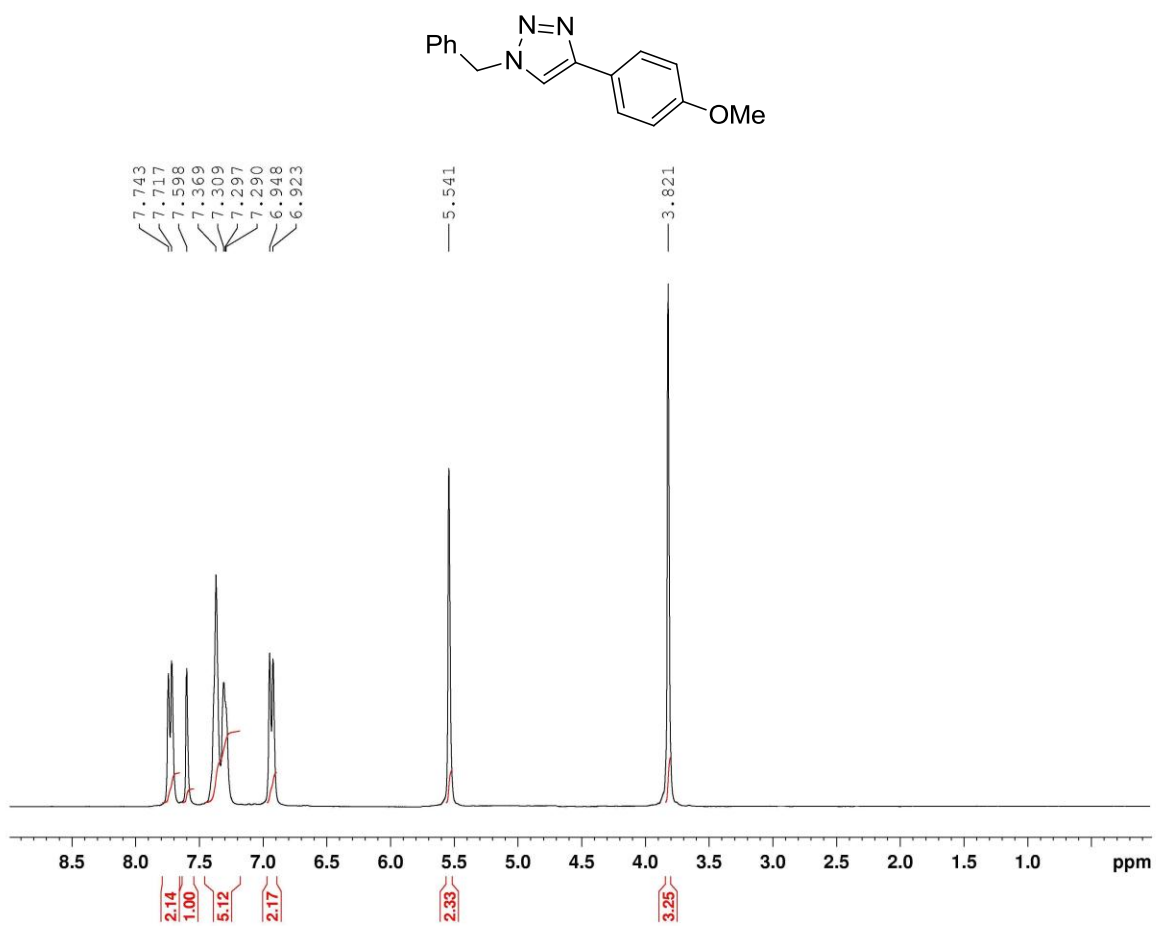



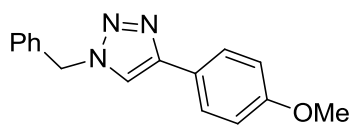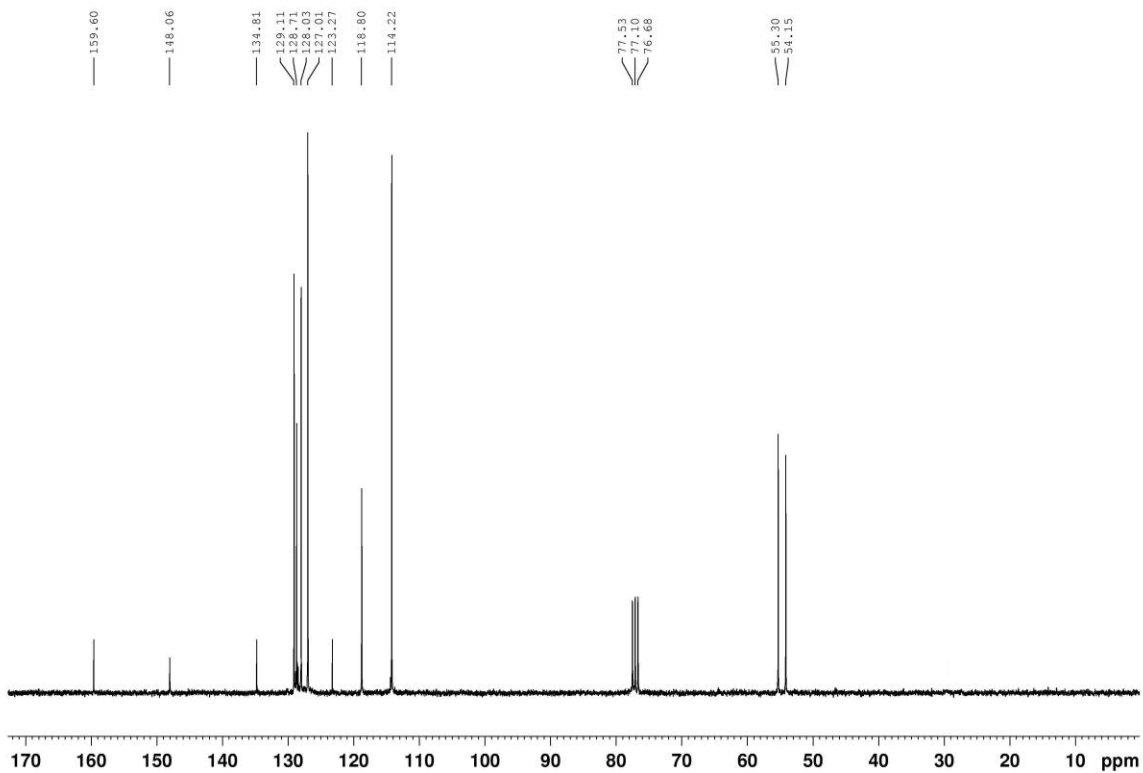

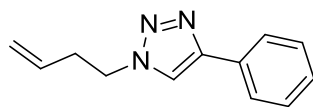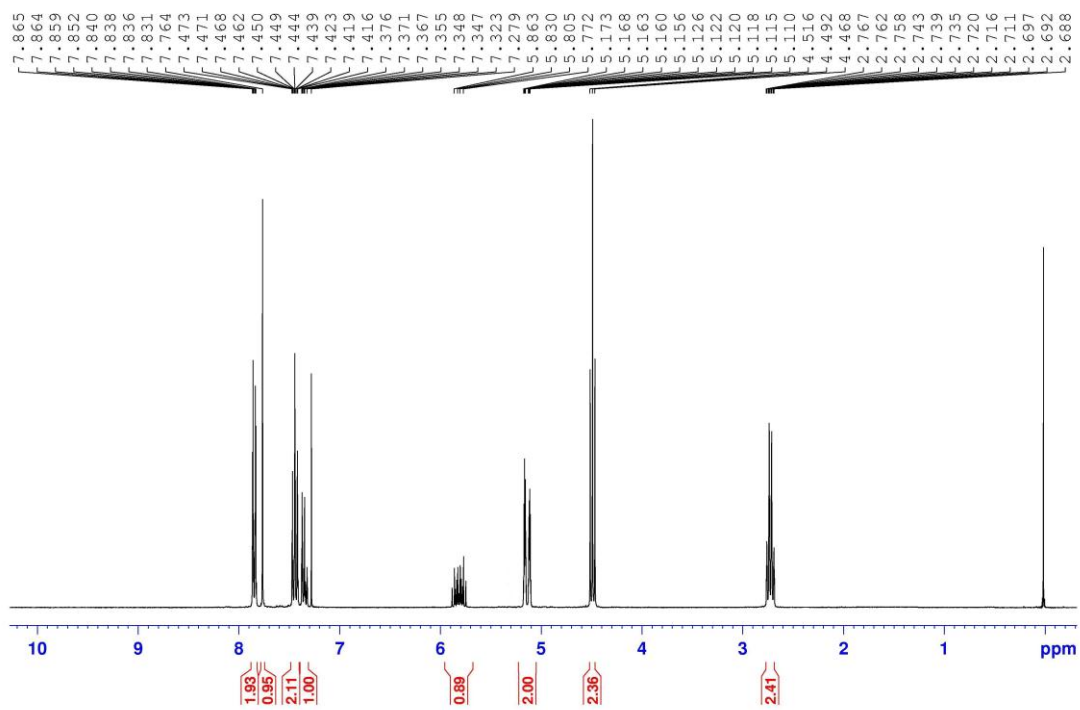

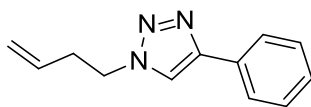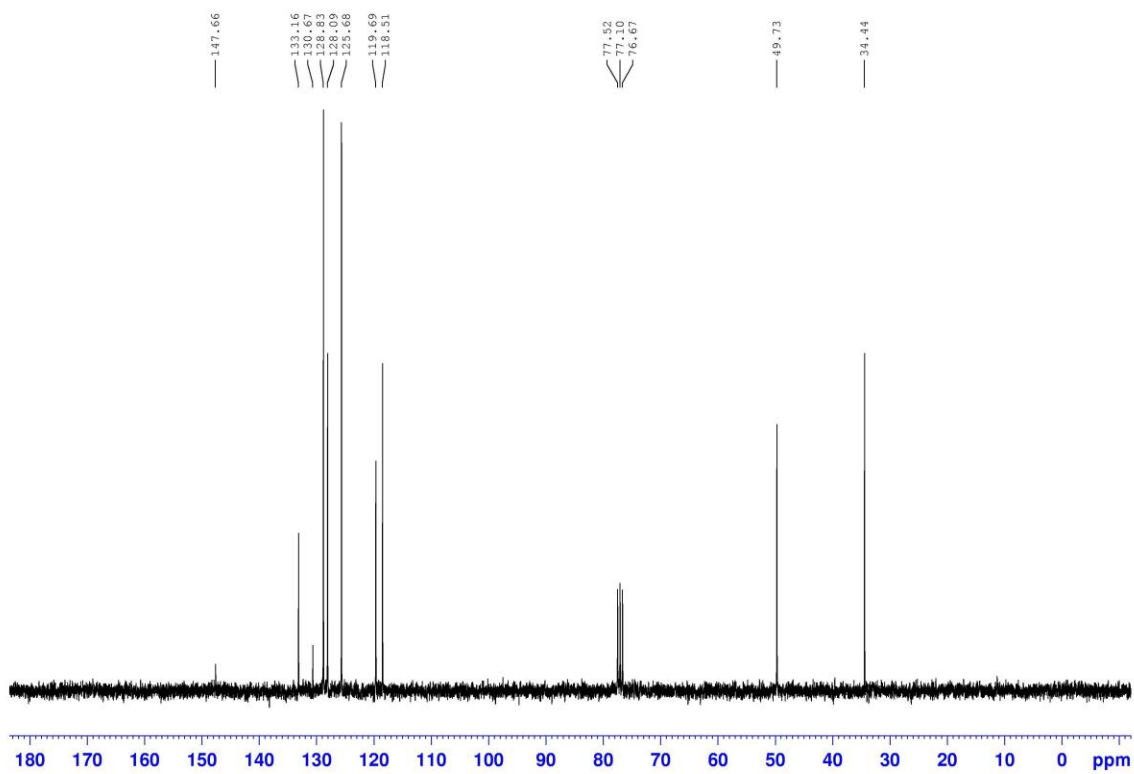

Supplement: c3gc40401c.pdf [file c3gc40401c.pdf]
